# Supplementary material for: Impact of Preconception Micronutrient Supplementation on Anemia and Iron Status during Pregnancy and Postpartum: A Randomized Controlled Trial in Rural Vietnam
Source: PubMed Central journal article supplement (PMC5137891; doi:10.1371/journal.pone.0167416), 2016-12-05

**S2 Figure: Hemoglobin changes during pregnancy, by anemia status and treatment group**

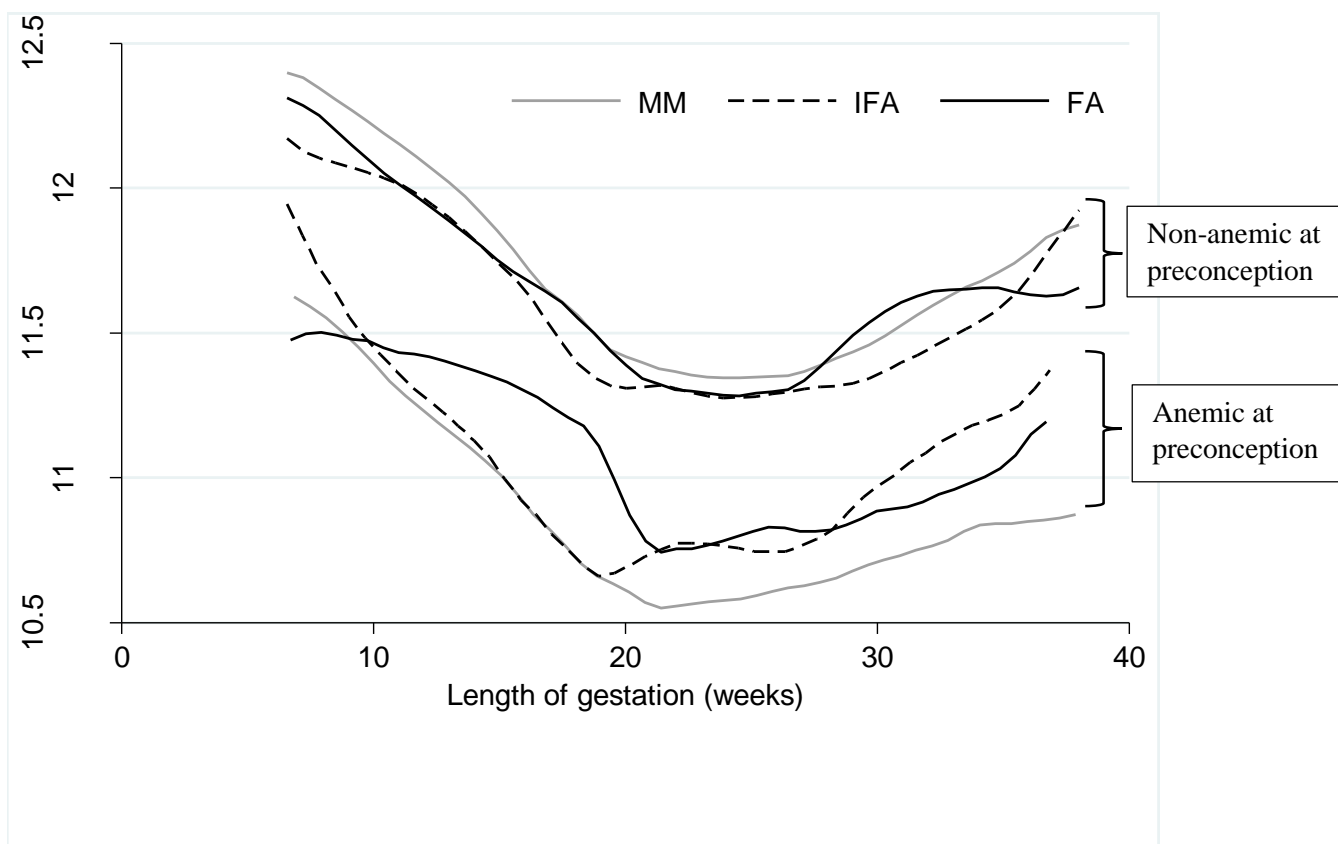

Supplement: pone.0167416.s002.pdf [file pone.0167416.s002.pdf]
